# Supplementary material
Source: publisher figshare collection journal article supplement (https://karger.figshare.com/ndownloader/files/29040024)
Supplement: Supplementary file 1 [file 29040024]

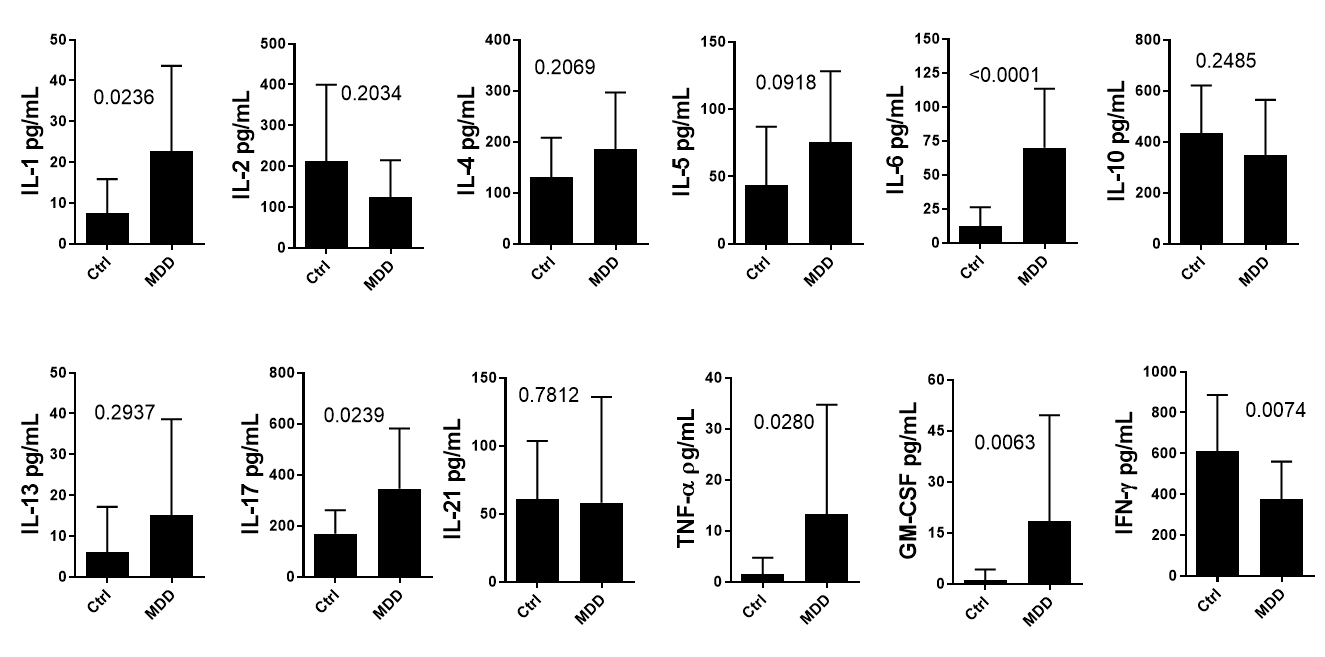


**Figure S2.** **The impact of MDD on cytokine production by T cells from nonallergic subjects.** PBMC cultures (1 x 106/mL) from healthy individuals (Ctrl, n=16) and depressed subjects (MDD, n=16), both groups without allergic diseases, were activated with anti-CD3/anti-CD28 beads (10 μL/mL) for 3 days. The levels of different cytokines (IL-1β, IL-6, TNF-α, GM-CSF, Il-17, IL-2, IFN-γ, IL-4, IL-5, IL-13 and IL-10) were quantified by Luminex. The mean values ​​were compared and the *p* value shown in the figures.
